# Supplementary material for: Human retinal pigment epithelial cells are protected against hypoxia by BNIP3
Source: PubMed Central journal article supplement — Ann Transl Med. 2020 Nov;8(22):1502. doi: 10.21037/atm-20-7145 (PMC7729317; doi:10.21037/atm-20-7145), 2020-11
Supplement: atm-08-22-1502-supplementary.pdf [file atm-08-22-1502-supplementary.pdf]

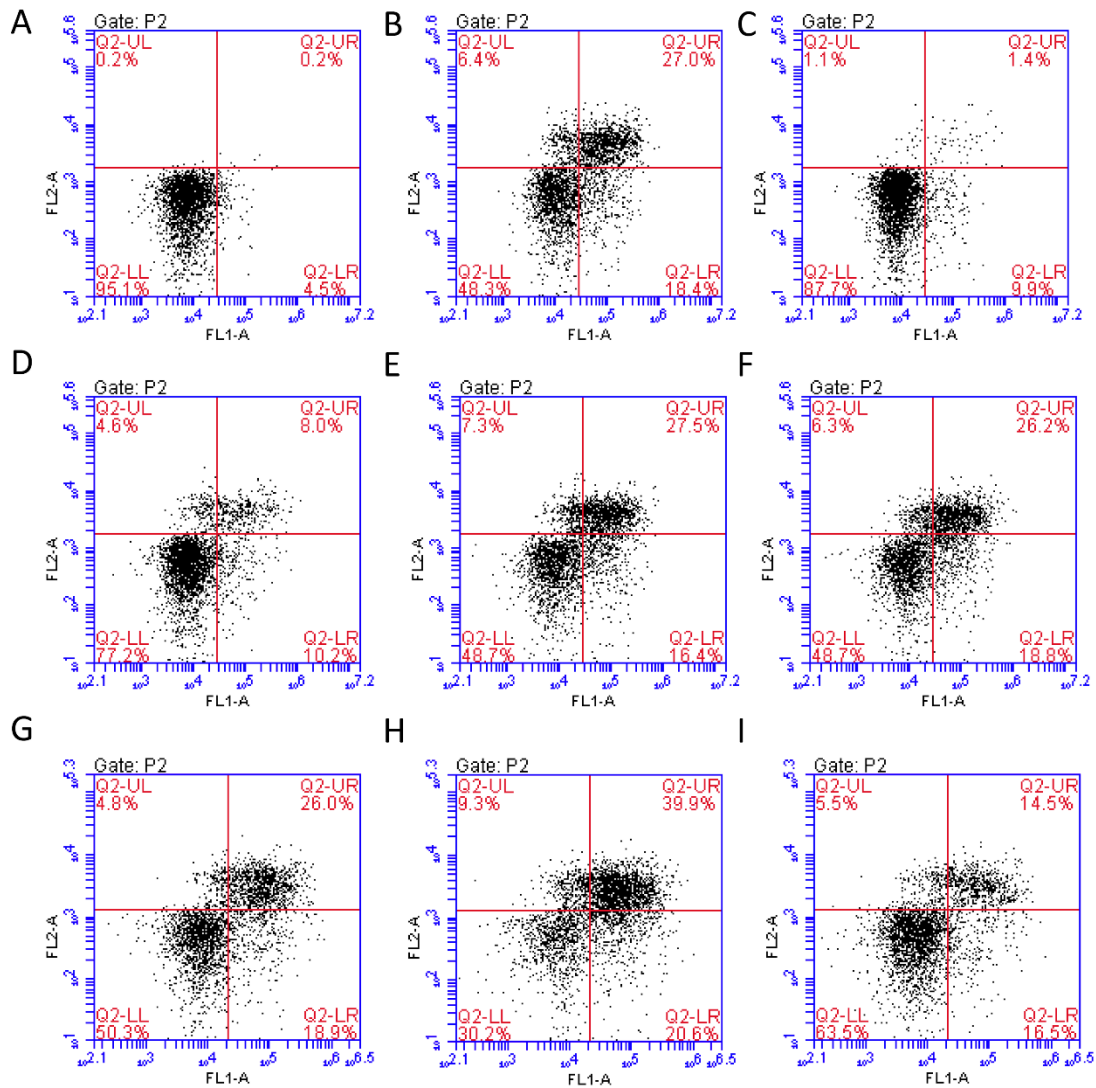

**Figure S1** Representative image from fluorescence-activated cell sorting (FACS) analysis of apoptosis. (A) D407 normal control cells. (B) D407 cells under condition of hypoxia (1% O<sub>2</sub>). (C) D407 cells under the condition of hypoxia (1% O<sub>2</sub>) with treatment of rapamycin. (D) D407 cells under the condition of hypoxia (1% O<sub>2</sub>) with overexpression of BNIP3. (E) D407 cells under the condition of hypoxia (1% O<sub>2</sub>) with overexpression of BNIP3 and treatment of 3-MA. (F) D407 cells under the condition of hypoxia (1% O<sub>2</sub>) with transfection of vector control. (G) D407 cells under the condition of hypoxia (1% O<sub>2</sub>) +NC. (H) D407 cells under condition of hypoxia (1% O<sub>2</sub>) with BNIP3 knockdown. (I) D407 cells under condition of hypoxia (1% O<sub>2</sub>) with BNIP3 knockdown and treatment of rapamycin.
